# Supplementary material for: Evaluation of Health-Related Values and Preferences of Adults Who Were Preterm Infants and Parents of Preterm Infants Concerning Use of Prophylactic Cyclooxygenase Inhibitor Drugs
Source: PubMed Central journal article supplement (PMC9999240; doi:10.1001/jamanetworkopen.2023.2273), 2023-03-09
Supplement: jamanetwopen-e232273-s002.pdf [file jamanetwopen-e232273-s002.pdf]

## Data Sharing Statement

Mitra. Evaluation of Health-Related Values and Preferences of Adults Who Were Preterm Infants and Parents of Preterm Infants Concerning Use of Prophylactic Cyclooxygenase Inhibitor Drugs. *JAMA Netw Open*. Published March 09, 2023.  
doi:10.1001/jamanetworkopen.2023.2273

### Data

**Data available:** Yes

**Data types:** Deidentified participant data

**How to access data:** [souvik.mitra@dal.ca](mailto:souvik.mitra@dal.ca)

**When available:** With publication

### Supporting Documents

**Document types:** Informed consent form

**How to access documents:** [souvik.mitra@dal.ca](mailto:souvik.mitra@dal.ca)

**When available:** With publication

### Additional Information

**Who can access the data:** researchers whose proposed use of the data has been approved

**Types of analyses:** for any purpose

**Mechanisms of data availability:** with a signed data access agreement
